# Supplementary material
Source: MDPI journal article supplement (https://www.mdpi.com/2227-9717/8/5/576)
Supplement: s1 [file s1]

# **Business Models for Carbon Capture, Utilization and Storage Technologies in the Steel Sector: A Qualitative Multi-Method Study**

**Hasan Muslemani <sup>1,\*</sup>, Xi Liang <sup>1</sup>, Katharina Kaesehage <sup>1</sup> and Jeffrey Wilson <sup>2</sup>**

<sup>1</sup> University of Edinburgh Business School, 29 Buccleuch Place, Edinburgh EH8 9JS, UK; Xi.Liang@ed.ac.uk (X.L.); Kathi.Kaesehage@ed.ac.uk (K.K.)

<sup>2</sup> School of Environment, Enterprise and Development, University of Waterloo, Waterloo, ON N2L 3G1, Canada; Jeffrey.Wilson@uwaterloo.ca (J.W.)

\* Correspondence: H.Muslemani@ed.ac.uk

Received: 15 April 2020; Accepted: 7 May 2020; Published: date

## **Semi-structured interview questions**

1. In your opinion, what are the main barriers to introducing CCUS (Carbon capture, utilization and storage) into the steel sector specifically, and the industrial sector more generally?
2. In your opinion, what are the main drivers to introducing CCUS into the steel sector specifically, and the industrial sector more generally?
3. What are the most important elements in building a successful business case for CCUS in the steel industry?
4. What are the most applicable revenue stream options which may support the economics of CCUS in the steel industry?
5. Which entities should be liable to funding CCUS projects in the steel industry?
6. What are the main risks facing CCUS projects in industry?

**Table S1.** CCUS (Carbon capture, utilization and storage) business model case studies.

| Country               | Project                 | Sector                    | Ownership structure                                  | Investment                                                     | Revenue and value                                                                | Public involvement                                                          | Risk management                                                                                                   |
|-----------------------|-------------------------|---------------------------|------------------------------------------------------|----------------------------------------------------------------|----------------------------------------------------------------------------------|-----------------------------------------------------------------------------|-------------------------------------------------------------------------------------------------------------------|
| <b>United Kingdom</b> | Teesside (proposal) [1] | CCS – industrial          | Capture owned by emitter, T&S by government          | CAPEX and OPEX: government support, Emitter equity repaid      | Avoidance of CO <sub>2</sub> price, government incentives and guaranteed returns | Grant funding, OPEX funding, risk sharing                                   | Government carries capital risk                                                                                   |
|                       | Cadent HyNet [2]        | CCS – hydrogen & industry | Uncertain – likely Cadent partial ownership of chain | Potential public funding for T&S                               | RAB sales of hydrogen                                                            | Ofgem RAB regulation, Ownership of key risks                                | Performance risk shared<br>Multiple emitter and CO <sub>2</sub> stores. Government will need to take on key risks |
|                       | CCS Commer. Program [3] | CCS – power               | Private                                              | DECC grant, equity, Debt (65%)                                 | Electricity sales (CfD)                                                          | Grant funding, Risk sharing, CfD                                            | Government carries majority of risks (storage, some capital, CfD price)                                           |
| <b>United States</b>  | Petra Nova [4]          | CCS – power EOR           | JV owns & operates capture.                          | JV equity (\$600m), DOE grant (\$190m), Debt (\$325m)          | EOR & oil sales, potential 45Q Tax Credits                                       | Small support, Japan ExIm Bank export credit guarantee for Japanese lenders | JV holds all technical and commercial risks. Lender exposure minimized through export credit guarantee            |
|                       | Illinois Basin [5]      | CCS - industrial          | PPP DOE and partners                                 | Government grant, partner equity                               | Potential 45Q Tax Credits, RD&D benefits                                         | Majority funder                                                             | Technical and commercial risks largely taken on by Government                                                     |
|                       | Lake Charles CCS [6]    | CCS – industrial EOR      | Private                                              | Equity investors (\$1.8bn), government loan guaranteed (\$2bn) | EOR: CO <sub>2</sub> sales, chemical sales                                       | DOE loan guarantees, equity investor tax credits                            | Existing T&S infrastructure, good investment rating. Public private risk sharing                                  |
| <b>Norway</b>         | Norwegian CCS [7]       | CCS – industrial          | PPP likely                                           | Government support and private equity                          | Avoidance of CO <sub>2</sub> price (Norway) & possible new CO <sub>2</sub> tax   | Promoter & lead developer                                                   | Likely largely public risk ownership                                                                              |
|                       | Sleipner [8]            | CCS – industrial/O&G      | Private JV                                           | JV funded                                                      | Avoidance of Norwegian CO <sub>2</sub> tax, natural gas sales                    | CO <sub>2</sub> taxes                                                       | Single party for whole chain                                                                                      |

|                        |                                 |                             |                                                       |                                                                   |                                                                                       |                                          |                                                                        |
|------------------------|---------------------------------|-----------------------------|-------------------------------------------------------|-------------------------------------------------------------------|---------------------------------------------------------------------------------------|------------------------------------------|------------------------------------------------------------------------|
| <b>China</b>           | Sinopec Qilu Petrochem [9]      | CCS – industrial            | Public (Sinopec state owned)                          | Likely public – 100% equity Sinopec                               | EOR oil sales                                                                         | State-owned enterprise                   | State owned – government bears all risk                                |
| <b>Canada</b>          | Quest [10]                      | CCS – Hydrogen              | Private                                               | Government grants & private equity                                | CO <sub>2</sub> price avoidance offset credits                                        | Grants and Alberta Offset Credits        | Government backed, reduced investment risk. Technical risk held by JV  |
| <b>UAE - Abu Dhabi</b> | Al Reyadah/ Emirates Steel [11] | CCS – industrial            | Public – Abu Dhabi National Oil Company               | JV equity                                                         | CO <sub>2</sub> use for EOR, oil sales, emissions reduction                           | ADNOC & Masdar are state owned           | State owned – Government bears all commercial and technical risk       |
| <b>Netherlands</b>     | Rotterdam CCS (Porthos)*        | CCS – industrial            | PPP likely for capture, semi-public T&S               | Public incentives & private investment                            | Avoidance of CO <sub>2</sub> price, Government incentives (Cost Plus or CfD-like)     | Support financially and risk sharing     | Public private risk sharing, limited details – pre-FID                 |
| <b>France Dunkirk</b>  | District Heating [12]           | District heating waste heat | Plant owned by industry, heat network by city council | Public – initial CAPEX, then 50% industry second capture facility | Waste heat sales, avoidance of CO <sub>2</sub> price, tax benefits, public perception | Financing & risk of initial heat network | Contracts for heat supply & demand, public investment and capital risk |

**Abbreviations:** CAPEX (capital expenditure); OPEX (operational expenditure); T&S (transport and storage); RAB (Regulated Asset Base); CfD (Contracts for Difference); DECC (formerly UK Department of Energy and Climate Change, now Department for Business, Energy and Industrial Strategy); DOE (US Department of Energy); EOR (Enhanced Oil Recovery); PPP (Public-Private Partnership); JV (Joint Venture); Abu Dhabi National Oil Company (ADNOC); pre-FID (pre-Final Investment Decision).

\*Data collected during personal communication with the project leader of the Rotterdam CCS project.

Table S2. Questionnaire coding frame.

| Code Structure, with categories numbered by roman numbers, sub-categories as letters and codes as numbers. |
|------------------------------------------------------------------------------------------------------------|
| Categories, Sub-categories and Codes                                                                       |
| <b>I. Barriers to CCUS implementation in the steel sector</b>                                              |
| A) <i>Economic barriers</i>                                                                                |
| B) <i>Technical barriers</i>                                                                               |
| <b>II. Drivers of CCUS implementation in the steel sector</b>                                              |
| A) <i>Financial drivers</i>                                                                                |
| B) <i>Regulatory/economic drivers</i>                                                                      |
| <b>III. Key elements to building a CCUS business model</b>                                                 |
| A) <i>Revenue models</i>                                                                                   |
| 1. Reward mechanisms, or ‘carrots’, such as tax credits, CfDs, carbon credits, etc.                        |
| 2. Punishment mechanisms, or ‘sticks’, such as carbon taxation.                                            |
| B) <i>Funding streams</i>                                                                                  |
| C) <i>Risk management</i>                                                                                  |
| D) <i>Ownership structure</i>                                                                              |

## References

1. Pöyry and Teesside Collective. A Business Case for a UK Industrial CCS Support Mechanism. A Pöyry Report on Behalf of and in Partnership with Teesside Collective, 2017. Available online: [http://www.teessidecollective.co.uk/wp-content/uploads/2017/02/0046\\_TVCA\\_ICCSBusinessModels\\_FinalReport\\_v200.pdf](http://www.teessidecollective.co.uk/wp-content/uploads/2017/02/0046_TVCA_ICCSBusinessModels_FinalReport_v200.pdf) (accessed on 19 April 2020).
2. Cadent. Available online: <https://cadentgas.com/news-media/news/june-2019/uk-government-funding-awarded-to-hynet-project> (accessed on 25 April 2020).
3. UK Government. Available online: <https://www.gov.uk/government/news/ccs-competition-launched-as-government-sets-out-long-term-plans> (accessed on 25 April 2020).
4. Kapetaki, Z.; Scowcroft, J. Overview of carbon capture and storage (CCS) demonstration project business models: Risks and enablers on the two sides of the Atlantic. *Energy Procedia* **2017**, *114*, 6623–6630.
5. MIT CC&ST Program. Available online: <https://sequestration.mit.edu/tools/projects/decatun.html> (accessed on 25 April 2020).
6. MIT CC&ST Program. Available online: <https://sequestration.mit.edu/tools/projects/leucadia.html> (accessed on 25 April 2020).
7. CCS Norway. Available online: <https://ccsnorway.com/public-and-private-cooperation/> (accessed on 25 April 2020).
8. MIT CC&ST Program. Available online: <https://sequestration.mit.edu/tools/projects/sleipner.html> (accessed on 25 April 2020).
9. MIT CC&ST Program. Available online: <https://sequestration.mit.edu/tools/projects/shengli.html> (accessed on 25 April 2020).
10. MIT CC&ST Program. Available online: <https://sequestration.mit.edu/tools/projects/quest.html> (accessed on 25 April 2020).
11. MIT CC&ST Program. Available online: [https://sequestration.mit.edu/tools/projects/esi\\_ccs.html](https://sequestration.mit.edu/tools/projects/esi_ccs.html) (accessed on 25 April 2020).
12. Element Energy. Industrial Carbon Capture Business Models: Report for the Department for Business, Energy and Industrial Strategy, UK, 2018.
